# Supplementary material
Source: PubMed Central journal article supplement (PMC4528732)
Supplement: supp_pp.15.00073_00073supp.pdf [file supp_pp.15.00073_00073supp.pdf]

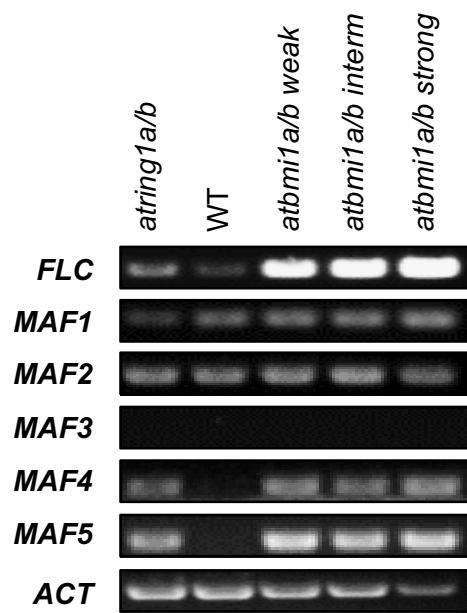

**Supplemental Figure S1.** Expression of *FLC*, *MAF1*, *MAF2*, *MAF3*, *MAF4* and *MAF5* in 14-day-old *ating1a/b*, WT and *atbmi1a/b* different phenotypes at ZT1 under LD conditions. *ACT2* was used as internal control. *MAF4* and *MAF5* are upregulated in *ating1a/b* mutants as in *atbmi1a/b* mutants. *FLC* is also upregulated but less that in *atbmi1a/b* mutants.

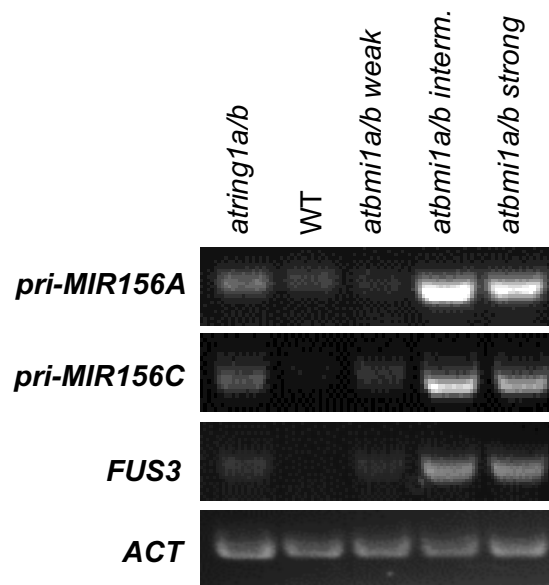

**Supplemental Figure S2.** AtRING1 together with AtBMI1 regulates the expression of *pri-MIR156A/C*. Expression levels of *pri-MIR156A*, *pri-MIR156C*, and the seed maturation gene *FUS3* in *ating1a/b*, WT and *atbmi1a/b* mutants at 14 DAG growing under LD at ZT1. *ACT2* was used as internal control. *FUS3* and *pri-MIR156A/C* are derepressed in *ating1a/b* mutants to *atbmi1a/b* weak levels.

## Supplemental Table S1. Primers used in this work

### qRT-PCR primers

| Name            | 5' to 3'                            |
|-----------------|-------------------------------------|
| FLC Fw          | GCCACCTTAAATCGGCGTTG                |
| FLC Rev         | CACAAAGTCTCTTGGCCAAAGAGAGAG         |
| MAF1 Fw         | CGGCTGAGTTTTACCTTAAACTCAAAGCC       |
| MAF1 Rev        | GAGGAAGATAAAAGGTTTGAGATTACACAGC     |
| MAF2 Fw         | GGCTGAGCTTTCACCTTAAACTTACAGC        |
| MAF2 Rev        | CCACATTGGCGCGAGGAAGATAAAAAGG        |
| MAF3 Fw         | GGCTGAGCTTTCACCTTAAACTTACAGC        |
| MAF3 Rev        | GCTTCGTTTTGTTTTACCTTATTCCACATTGGG   |
| MAF4 Fw         | GCTACGGAAAAGTCATCCAAGGAGATGC        |
| MAF4 Rev        | CGAAAGTAAATACTATATCATCTGTCTCCGAAGG  |
| MAF5 Fw         | CCACCAATCATCAACGGCTGATTTTTTCATCATCC |
| MAF5 Rev        | CCGTATGCAGGGGGAGAAGAGG              |
| FT Fw           | CGAACGGTGATGATGCCTATAGTAG           |
| FT Rev          | CACTCTATTTTCTCCCTCTCT               |
| CO Fw           | CCAATGGACAGAGAAGCCAGG               |
| CO Rev          | GCATCGTGTGAACCTTGC                  |
| Pri-MIR156A Fw  | CTTCGTTCTCTATGTCTCAATCTCTC          |
| Pri-MIR156A Rev | TGATTAAGGCTAAAGGTCCTCTC             |
| Pri-MIR156C Fw  | GTGATAATGAGTGATGACTGATG             |
| Pri-MIR156C Rev | GAAAACGTGACCGGGACCGAATCG            |
| FUS3 Fw         | TCATGGTCTGCAGCTAGGTGACTT            |
| FUS3 Rev        | CGTCTACTTCTTCTTCCGATGC              |
| LEC1 Fw         | TGGAGCTCCCTTCTCTACTATCA             |
| LEC1 Rev        | CTGCTGGACCACGATACCATTGTT            |
| pri-miR172b Fw  | CGGATTAGGGCGTTAATTACAATG            |
| pri-miR172b Rev | GGTCTCTGGACGAACTATTCTGTA            |
| SLP3 Fw         | CTTAGCTGGACACAACGAGAGAAGGC          |
| SLP3 Rev        | GAGAAACAGACAGAGACACAGAGGA           |
| SLP9 Fw         | CAAGGTTCAAGTTGGTGGAGGA              |
| SLP9 Rev        | TGAAGAAGCTCGCCATGTATTG              |
| ACT2 Fw         | CACTTGCACCAAGCAGCATGAAGA            |
| ACT2 Rev        | AATGGAACCACCGATCCAGACACT            |

### ChIP-PCR primers

| Name             | 5' to 3'                     |
|------------------|------------------------------|
| FLC ChIP Fw      | TCTGGTTATCGATTGCGATTCT       |
| FLC ChIP Rev     | CGTGATATACAAATCCAAGAGAAC     |
| MAF4 ChIP Fw     | CCCGGTAGATTTGTTGAGAAAC       |
| MAF4 ChIP Rev    | CACTTGAAATTAACCAAGGAATGC     |
| MAF5ChIP Fw      | CAAGTCATCTTAACTTTGTCTTGCT    |
| MAF5ChIP Rev     | GGCACTCGTTCCACTAGATT         |
| MIR156A ChIP Fw  | CTCTCAAATCTCAAGTTCATTGCC     |
| MIR156A ChIP Rev | GGCTCTTGTCGCTTTCTTATC        |
| MIR156C ChIP Fw  | TCTCCGTTTTGCTTGTTAAC         |
| MIR156C ChIP Rev | AGAAGATTGGAAGGAGGCAG         |
| FUS3 ChIP Fw     | ACTTTTGCTACACTTGTCCACCATG    |
| FUS3 ChIP Rev    | CGCAACAAGATCTAATGCCACT       |
| WUS ChIP Fw      | CAAACCTCTCTTCTCTTGTCTCTCTC   |
| WUS ChIP Rev     | GGCTCCATGTGTGTTGATTGAC       |
| ACT7 ChIP Fw     | GCGATGTTTGAGTTTCAATAAACGCTGC |
| ACT7 ChIP Rev    | CTCACCTTCACCATTCAGTTCCA      |
